# Supplementary material for: Dermal and inhalable cobalt exposure—Uptake of cobalt for workers at Swedish hard metal plants
Source: PubMed Central journal article supplement (PMC7410254; doi:10.1371/journal.pone.0237100), 2020-08-06
Supplement: pone.0237100.s001.pdf [file pone.0237100.s001.pdf]

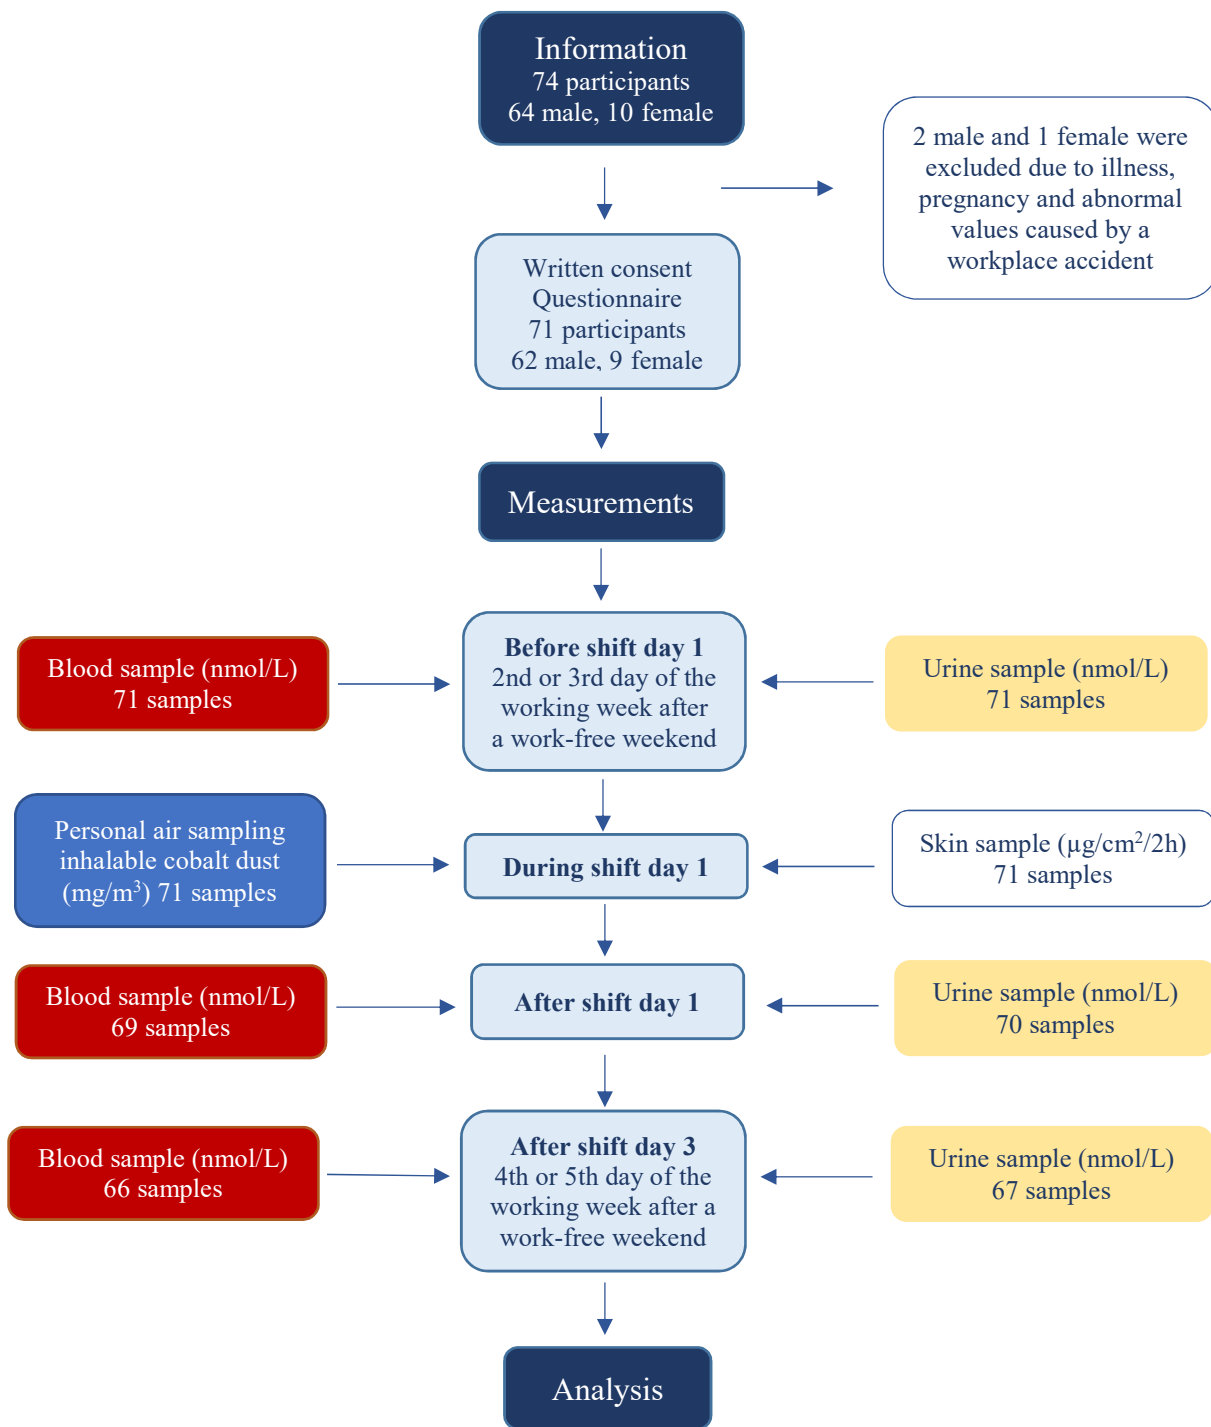

**S1 Fig. Flow chart of the procedure of the study.**
